# Supplementary material
Source: PubMed Central journal article supplement (PMC3123051)
Supplement: supp_M111.224998_jbc.M111.224998-1.pdf [file supp_M111.224998_jbc.M111.224998-1.pdf]

**Supplementary Fig. 1 The effect of different shRNAs constructs on CIC-5 expression in OK cells.** The listed CIC-5-shRNA constructs were transfected into OK cells at confluency and studied 5 days later. Lysates were made and Western blotting was performed for CIC-5, NHE3 and actin. (A) A representative blot shows two examples of separate matched transfections. (B) Quantitative analysis of CIC-5 protein expression by densitometry is shown. Total CIC-5 is normalized to  $\beta$ -actin. Value of CIC-5/  $\beta$ -actin is calculated as percentage of sc group. Results are mean  $\pm$  SE of data from 3 independent experiments. Further studies were primarily carried out with c27 which had the greatest reduction of CIC-5. p values are in comparison with sc group. (C) Quantitative analysis of NHE3 protein expression by densitometry is shown. Total NHE3 is normalized to  $\beta$ -actin. Value of NHE3/  $\beta$ -actin is calculated as percentage of sc group. Results are mean  $\pm$  SE of data from 3 independent experiments. c1869 construct reduced NHE3 expression. This construct was not used in further experiments.
